# Supplementary material for: Correlation Analysis between Polysomnography Diagnostic Indices and Heart Rate Variability Parameters among Patients with Obstructive Sleep Apnea Hypopnea Syndrome
Source: PLoS One. 2016 Jun 2;11(6):e0156628. doi: 10.1371/journal.pone.0156628 (PMC4890801; doi:10.1371/journal.pone.0156628)
Supplement: S1 Dataset — (XLSX) [file pone.0156628.s001.xlsx]

## Sheet: Sheet1
MEANRR	MEDIANRR	MEANHR	SDNN	RMSSD	NN50	pNN50	VLF[%]	LF[%]	HF[%]	LF/HF	LF[n.u.]	HF[n.u.]	VLF [abs]	LF [abs]	HF [abs]
881.314	887.781	68.4398	112.272	125.964	153.771	44.5857	36.6001	21.8633	41.5366	0.678774	36.5392	63.4608	3982.57	2413.57	4277.68
1008.33	1007.38	59.6977	58.0026	55.7124	105.562	36.0753	43.2412	12.5013	44.2575	0.455035	26.7619	73.2381	1920.29	337.885	1063.57
801.528	798.556	75.1589	67.3595	49.9929	77.4375	21.2652	45.9952	33.9304	20.0744	2.78724	65.2519	34.7481	2512.38	1463.14	705.023
736.743	738.366	81.8251	70.6955	58.5479	126.845	32.3607	40.5075	17.8629	41.6295	0.743211	34.3702	65.6298	2597.07	1053.64	1754.97
770.603	772.688	78.1402	70.5934	36.5859	52.6354	13.8918	52.11	29.5696	18.3204	2.26181	63.4991	36.5009	2981.14	1342.83	747.071
711.079	714.437	85.0527	28.2707	15.9782	6.1875	1.45096	56.6451	21.149	22.206	1.98954	53.1168	46.8832	546.09	148.144	115.905
1000.47	1007.76	60.3599	93.1721	98.5656	86.6562	29.1803	39.8455	23.9731	36.1814	0.832166	42.5258	57.4742	4504.69	2449.25	3723.1
904.11	909.7	66.9947	90.6856	55.7293	71.7188	22.7833	63.9334	21.4705	14.5962	2.74757	63.2567	36.7433	6819.1	1415.2	980.136
739.436	739.4	81.999	41.1704	20.8378	14.1042	3.902	48.8103	32.3413	18.8483	2.89082	66.0084	33.9916	926.74	544.771	291.117
764.963	767.392	78.5354	52.39	52.7465	52.4271	13.4331	38.1417	19.0343	42.824	0.591043	33.6778	66.3222	958.783	502.949	1016.82
828.218	829.227	72.7702	76.158	65.5834	55.4792	15.893	39.3124	27.0246	33.663	1.03032	46.6074	53.3926	2884.65	1238.37	1673.58
989	998.789	60.9314	73.8667	44.6318	64.0729	22.0762	56.6994	17.7016	25.599	1.64193	50.683	49.317	4605.86	945.726	672.855
880.971	887.777	68.4895	58.0091	37.7385	63.6771	19.932	50.7237	14.5041	34.7722	1.01405	39.0195	60.9805	2357.29	443.089	809.082
700.347	697.159	86.0013	60.5343	26.259	18.1042	4.39005	70.7006	16.3144	12.985	1.93894	59.9131	40.0869	3247.35	687.773	416.387
1074.96	1086.51	56.2297	97.178	73.2701	95.3958	34.3655	56.4619	16.9808	26.5572	1.4363	48.4534	51.5466	7106.27	1567.68	1617.14
750.781	745.12	80.2857	95.2618	47.3727	62.625	16.0546	71.3598	20.7601	7.88016	3.33131	73.0562	26.9438	6782.11	1777.36	639.906
789.705	779.177	76.2937	102.675	95.7761	142.792	38.3878	53.683	25.1047	21.2123	1.39914	53.7817	46.2183	4514.64	2257.65	2038.94
939.413	941.379	63.9318	72.0961	52.8272	19.119	5.98554	68.4178	14.6947	16.8875	2.62424	56.7223	43.2777	4346.9	978.396	747.921
725.443	742.26	83.0569	101.452	61.4563	75.5625	18.6337	66.7411	24.8782	8.38068	5.1192	77.7543	22.2457	6959.26	2310.05	752.318
699.486	703.949	85.9249	30.6764	16.6018	6.78125	1.57914	74.9395	15.7578	9.30268	2.58452	65.7499	34.2501	795.428	109	60.9181
966.861	968.964	62.5274	121.967	93.4584	154.927	50.8887	57.3505	22.3116	20.3379	1.65813	55.3486	44.6514	9782.04	3150.5	2462.28
864.819	873.749	70.149	69.3338	38.659	68.7917	21.5781	69.176	21.0619	9.76209	3.5006	69.9364	30.0636	3772.08	935.503	428.193
725.776	726.613	82.9331	48.3917	27.8402	24.5104	6.22377	48.5679	26.4542	24.9778	1.56917	54.2162	45.7838	1502.04	604.43	447.887
861.979	862.162	69.836	63.3744	37.3982	54.7708	16.538	51.9811	24.8719	23.147	1.57516	54.6561	45.3439	2314.38	899.587	818.526
932.458	938.343	64.4281	46.1588	26.7853	19.4932	6.34039	71.0071	16.3737	12.6193	1.64938	59.3879	40.6121	1810.92	330.338	204.501
842.41	870.223	71.2242	119.631	134.959	77.431	21.6292	49.4249	33.4553	17.1198	1.95419	66.1498	33.8502	7717.75	5224.09	2673.28
928.571	928.893	64.6154	30.7294	99.5182	32.131	9.93789	20.1306	29.719	50.1504	0.592598	37.2095	62.7905	166.602	245.957	415.048
943.546	942.009	63.5899	41.2635	103.851	74.008	23.3438	20.5907	22.9309	56.4784	0.406012	28.8769	71.1231	399.277	444.656	1095.18
956.032	960.708	62.7594	39.6215	102.197	42	13.4615	46.7169	23.5262	29.7569	0.790614	44.1532	55.8468	536.754	270.304	341.892
962.669	960.288	62.3267	42.0238	105.177	77.271	24.7588	23.4247	24.6158	51.9595	0.473749	32.1458	67.8542	429.706	451.555	953.154
973.231	970.173	61.6503	47.0709	108.59	93.712	30.2932	19.2624	28.9737	51.7639	0.559728	35.8863	64.1137	430.047	646.86	1155.67
981.056	978.323	61.1586	55.6675	107.047	86.068	28.1967	33.4541	33.2442	33.3016	0.998275	49.9568	50.0432	1092.44	1085.59	1087.46
1025.38	982.304	58.5147	275.553	414.38	86.876	29.4521	11.8083	19.7519	68.4397	0.288604	22.3966	77.6034	9529.16	15939.5	55229.9
947.257	958.999	63.3408	117.634	108.409	69.225	21.9048	18.9594	41.8844	39.1562	1.06967	51.6832	48.3168	2923.08	6457.55	6036.94
993.475	992.111	60.3941	49.3697	47.8272	94.215	31.2292	21.9928	29.5479	48.4593	0.609746	37.8784	62.1216	446.514	599.904	983.86
998.787	994.089	60.0729	52.2891	49.6588	89.757	29.6667	26.1301	21.902	51.968	0.421451	29.6494	70.3506	462.215	387.424	919.262
966.447	982.275	62.0831	111.238	104.934	80.359	25.89	34.1196	33.6574	32.223	1.04452	51.0887	48.9113	2625.84	2590.27	2479.88
955.642	962.673	62.785	78.6694	64.3787	62.096	19.8083	32.5353	41.409	26.0557	1.58925	61.3788	38.6212	4636.44	5900.98	3713.06
951.815	952.355	63.0374	44.9958	37.0931	57.291	18.1529	70.8095	12.389	16.8016	0.73737	42.4418	57.5582	1757.27	307.456	416.962
962.09	964.427	62.3642	65.4875	59.6779	65.029	20.9003	29.0485	33.3133	37.6382	0.885092	46.9522	53.0478	1387.65	1591.38	1797.98
915.645	950.028	65.5276	152.024	58.4592	54.834	16.5138	59.2862	18.6453	22.0685	0.844882	45.796	54.204	1850.64	582.021	688.878
891.94	912.367	67.2691	86.4805	71.2361	16.771	4.77612	60.0683	23.7801	16.1516	1.4723	59.5518	40.4482	895.598	354.553	240.816
941.038	940.358	63.7594	53.8997	51.6425	22.702	6.91824	20.7464	43.732	35.5216	1.23114	55.1798	44.8202	146.222	308.224	250.358
956.435	954.305	62.733	51.6819	39.8237	66.615	21.0863	45.58	27.8402	26.5797	1.04742	51.1581	48.8419	1105.94	675.505	644.921
950.854	960.632	63.1012	122.302	159.415	71.065	22.6115	25.621	20.1445	54.2345	0.371433	27.0836	72.9164	5885.95	4627.83	12459.4
1026.22	962.297	58.467	355.617	507.913	71.723	24.3151	12.2574	30.9623	56.7803	0.545301	35.2877	64.7123	5231.23	13214.2	24232.8
952.42	956.368	62.9974	55.6622	40.0748	65.762	20.7006	40.2027	33.1173	26.68	1.24128	55.3826	44.6174	959.944	790.761	637.054
952.493	951.172	62.9926	51.0207	48.4244	87.628	28.4314	16.728	35.277	47.9949	0.735015	42.3636	57.6364	351.936	742.183	1009.75
996.573	991.767	60.2063	73.8469	102.19	90.73	30	8.20318	29.5432	62.2536	0.474562	32.1833	67.8167	518.625	1867.79	3935.82
1001.98	996.507	59.8814	53.7653	60.2354	76.882	25.5034	29.5928	32.1096	38.2976	0.838424	45.6056	54.3944	970.545	1053.09	1256.03
981.843	984.928	61.1096	52.1208	51.4896	42.656	13.7705	59.5379	10.9151	29.547	0.369413	26.976	73.024	1368.66	250.916	679.228
996.867	996.147	60.1886	42.4197	53.5912	51.63	17.039	32.9556	23.7516	43.2928	0.548626	35.4266	64.5734	425.725	306.826	559.263
